# Supplementary material for: Elevated temperature drives a shift from selfing to outcrossing in the insect-pollinated legume, faba bean (Vicia faba)
Source: PubMed Central journal article supplement (PMC5429019; doi:10.1093/jxb/erw430), 2016-12-07
Supplement: erw430_suppl_Supplementary_Table_S1.pdf [file erw430_suppl_Supplementary_Table_S1.pdf]

## Supplementary data

### Bishop *et al.* Elevated temperature drives a shift from selfing to outcrossing in the insect pollinated legume, faba bean (*Vicia faba*).

**Table S1** Model simplification tables for establishment of treatment effect sizes and significance. Model parameters are deleted from the maximal model in steps, if a likelihood ratio test comparing the new model with the previous model finds no significant difference in explanatory power ( $p > 0.05$ ), the parameter is left out of the model. Mixed models are distinguished by random effects (in brackets) in the maximal model, candidate models are compared with a  $\chi^2$  test. Interactions between terms are indicated using the “:” symbol

#### A) Outcrossing per cabinet\*cage combination, flight cage experiment

|                                                    |                                               |                 |           |                |
|----------------------------------------------------|-----------------------------------------------|-----------------|-----------|----------------|
| <b>Maximal model:</b>                              | Outcrossing (cbind(dark,light)) ~ temperature |                 |           |                |
| <b>Error family &amp; link function:</b>           | Quasibinomial, logit                          |                 |           |                |
| <b>Deletion step</b>                               | <b>Parameter</b>                              | <b>deviance</b> | <b>df</b> | <b>p-value</b> |
| <b>1</b>                                           | Temperature                                   | -38.748         | 1         | <0.001         |
| <b>Fixed effect in minimal adequate model</b>      |                                               | <b>Estimate</b> | <b>SE</b> | <b>t-value</b> |
| Control temperature plants with insect pollination |                                               | -1.5930         | 0.1639    | -9.718         |
| Effect of heat stress                              |                                               | 0.8751          | 0.2120    | 4.127          |

#### B) Seed number per plant, flight cage experiment

|                                                                                   |                                                                                              |                            |           |                |
|-----------------------------------------------------------------------------------|----------------------------------------------------------------------------------------------|----------------------------|-----------|----------------|
| <b>Maximal model:</b>                                                             | Bean number ~ temperature + pollination + temperature : pollination + (1 cabinet) + (1 cage) |                            |           |                |
| <b>Error family &amp; link function:</b>                                          | Negative binomial, log                                                                       |                            |           |                |
| <b>Deletion step</b>                                                              | <b>Parameter</b>                                                                             | <b><math>\chi^2</math></b> | <b>df</b> | <b>p-value</b> |
| <b>1</b>                                                                          | Temperature : pollination                                                                    | 0.6595                     | 3         | 0.8827         |
| <b>2</b>                                                                          | Temperature                                                                                  | 7.9157                     | 1         | 0.004901       |
|                                                                                   | Pollination                                                                                  | 38.524                     | 3         | <0.001         |
| <b>3</b>                                                                          | Pollination simplified to either exclusion or any one of three pollination treatments        | 0.2254                     | 2         | 0.8934         |
| <b>Fixed effect in minimal adequate model</b>                                     |                                                                                              | <b>Estimate</b>            | <b>SE</b> | <b>z-value</b> |
| Control temperature plants excluded from pollination and no tripping              |                                                                                              | 3.33848                    | 0.09536   | 35.01          |
| Heat stress                                                                       |                                                                                              | -0.50327                   | 0.10121   | -4.97          |
| Insect pollination, insect pollination + hand tripping, exclusion + hand tripping |                                                                                              | 0.70716                    | 0.10288   | 6.87           |

### C) Yield mass per plant, flight cage experiment

|                                                                                                                               |                                                                                             |                            |           |                |
|-------------------------------------------------------------------------------------------------------------------------------|---------------------------------------------------------------------------------------------|----------------------------|-----------|----------------|
| <b>Maximal model:</b>                                                                                                         | Yield mass ~ temperature + pollination + temperature : pollination + (1 cabinet) + (1 cage) |                            |           |                |
| <b>Error family &amp; link function:</b>                                                                                      | Gaussian, identity                                                                          |                            |           |                |
| <b>Deletion step</b>                                                                                                          | <b>Parameter</b>                                                                            | <b><math>\chi^2</math></b> | <b>df</b> | <b>p-value</b> |
| 1                                                                                                                             | Temperature : pollination                                                                   | 0.8092                     | 3         | 0.8473         |
| 2                                                                                                                             | Temperature                                                                                 | 4.8991                     | 1         | 0.02687        |
|                                                                                                                               | Pollination                                                                                 | 40.925                     | 3         | <0.001         |
| 3                                                                                                                             | Pollination simplified to either exclusion or any one of three pollination treatments       | 0.7657                     | 2         | 0.6819         |
| <b>Fixed effect in minimal adequate model</b>                                                                                 |                                                                                             | <b>Estimate</b>            | <b>SE</b> | <b>t-value</b> |
| Control temperature plants with insect pollination, without hand tripping, with hand tripping, or excluded with hand tripping |                                                                                             | 32.533                     | 2.502     | 13.002         |
| Heat stress                                                                                                                   |                                                                                             | -7.468                     | 3.420     | -2.184         |
| Exclusion from insect pollinators and no tripping                                                                             |                                                                                             | -14.580                    | 1.733     | -8.412         |

### D) Outcrossing per plant, field experiment

|                                               |                                                                                                                                           |                            |           |                |
|-----------------------------------------------|-------------------------------------------------------------------------------------------------------------------------------------------|----------------------------|-----------|----------------|
| <b>Maximal model:</b>                         | Outcrossing (cbind(dark,light)) ~ temperature + site + temperature : site + (1 block) + (1 cabinet) + (1 observation level random effect) |                            |           |                |
| <b>Error family &amp; link function:</b>      | Binomial, logistic                                                                                                                        |                            |           |                |
| <b>Deletion step</b>                          | <b>Parameter</b>                                                                                                                          | <b><math>\chi^2</math></b> | <b>df</b> | <b>p-value</b> |
| 1                                             | Temperature : site                                                                                                                        | 9.919                      | 1         | 0.002          |
| <b>Fixed effect in minimal adequate model</b> |                                                                                                                                           | <b>Estimate</b>            | <b>SE</b> | <b>z-value</b> |
| Control temperature plants at Harborne site   |                                                                                                                                           | -0.813                     | 0.340     | -2.388         |
| Heat stress                                   |                                                                                                                                           | 2.195                      | 0.479     | 4.575          |
| Sonning site                                  |                                                                                                                                           | 0.101                      | 0.489     | 0.207          |
| Heat stress : Sonning site                    |                                                                                                                                           | -2.239                     | 0.689     | -3.249         |

### E) Seed number per plant, field experiment

|                                                              |                                                                                                                                                                                   |                            |           |                |
|--------------------------------------------------------------|-----------------------------------------------------------------------------------------------------------------------------------------------------------------------------------|----------------------------|-----------|----------------|
| <b>Maximal model:</b>                                        | Bean number ~ temperature + pollination + site + temperature : pollination + temperature : site + pollination : site + temperature : pollination : site + (1 block) + (1 cabinet) |                            |           |                |
| <b>Error family &amp; link function:</b>                     | Negative binomial                                                                                                                                                                 |                            |           |                |
| <b>Deletion step</b>                                         | <b>Parameter</b>                                                                                                                                                                  | <b><math>\chi^2</math></b> | <b>df</b> | <b>p-value</b> |
| 1                                                            | Temperature : pollination : site                                                                                                                                                  | 0.583                      | 1         | 0.445          |
| 2                                                            | Temperature : pollination                                                                                                                                                         | 4.472                      | 1         | 0.034          |
|                                                              | Temperature : site                                                                                                                                                                | 0.421                      | 1         | 0.517          |
|                                                              | Pollination : site                                                                                                                                                                | 8.562                      | 1         | 0.003          |
| <b>Fixed effect in minimal adequate model</b>                |                                                                                                                                                                                   | <b>Estimate</b>            | <b>SE</b> | <b>z-value</b> |
| Control temperature plants that were bagged at Harborne site |                                                                                                                                                                                   | 2.7213                     | 0.1177    | 23.129         |
| Heat stress                                                  |                                                                                                                                                                                   | -0.8150                    | 0.1412    | -5.771         |
| Insect pollination                                           |                                                                                                                                                                                   | 0.5544                     | 0.1614    | 3.435          |
| Sonning site                                                 |                                                                                                                                                                                   | 0.2638                     | 0.1425    | 1.851          |
| Heat stress : insect pollination                             |                                                                                                                                                                                   | 0.4044                     | 0.1934    | 2.091          |
| Insect pollination : Sonning site                            |                                                                                                                                                                                   | -0.5593                    | 0.1927    | -2.903         |

**F) Yield mass per plant, field experiment**

Yield mass ~ temperature + pollination + site + temperature : pollination +  
temperature : site + pollination : site + temperature : pollination : site + (1|block)  
+ (1|cabinet)

| <b>Maximal model:</b>                                        |                                  |                            |           |                |
|--------------------------------------------------------------|----------------------------------|----------------------------|-----------|----------------|
| <b>Error family &amp; link function:</b>                     |                                  | Gaussian, identity         |           |                |
| <b>Deletion step</b>                                         | <b>Parameter</b>                 | <b><math>\chi^2</math></b> | <b>df</b> | <b>p-value</b> |
| 1                                                            | Temperature : pollination : site | 0.0026                     | 1         | 0.9595         |
| 2                                                            | Temperature : pollination        | 0.165                      | 1         | 0.6846         |
|                                                              | Temperature : site               | 1.3716                     | 1         | 0.2415         |
|                                                              | Pollination : site               | 5.3027                     | 1         | 0.02129        |
| 3                                                            | Temperature                      | 11.902                     | 1         | 0.00056        |
|                                                              | Pollination : site               | 5.2322                     | 1         | 0.02217        |
| <b>Fixed effect in minimal adequate model</b>                |                                  | <b>Estimate</b>            | <b>SE</b> | <b>t-value</b> |
| Control temperature plants that were bagged at Harborne site |                                  | 8.5891                     | 0.9057    | 9.484          |
| Heat stress                                                  |                                  | -4.1896                    | 0.7740    | -5.413         |
| Insect pollination                                           |                                  | 4.3003                     | 1.0945    | 3.929          |
| Sonning site                                                 |                                  | 0.5250                     | 1.1580    | 0.453          |
| Insect pollination : Sonning site                            |                                  | -3.5342                    | 1.5479    | -2.283         |

**G) Pollinator density, field experiment. NB. Mainplots are indicated with letters in figure 1, main text. Management treatments were conducted at this mainplot level.**

| <b>Maximal model:</b>                         |                   | Pollinator number ~ management + site + management : site + (1 mainplot) |           |                |
|-----------------------------------------------|-------------------|--------------------------------------------------------------------------|-----------|----------------|
| <b>Error family &amp; link function:</b>      |                   | Gaussian, identity                                                       |           |                |
| <b>Deletion step</b>                          | <b>Parameter</b>  | <b><math>\chi^2</math></b>                                               | <b>df</b> | <b>p-value</b> |
| 1                                             | management : site | 0.013                                                                    | 1         | 0.909          |
| 2                                             | management        | 0.117                                                                    | 1         | 0.733          |
|                                               | site              | 0.207                                                                    | 1         | 0.649          |
| 3                                             | site              | 0.205                                                                    | 1         | 0.651          |
| <b>Fixed effect in minimal adequate model</b> |                   | <b>Estimate</b>                                                          | <b>SE</b> | <b>t-value</b> |
| Intercept                                     |                   | 1.42                                                                     | 0.19      | 7.431          |

**H) Pollinator species count. NB. Mainplots are indicated with letters in figure 1, main text. Management treatments were conducted at this mainplot level.**

| <b>Maximal model:</b>                         |                   | Pollinator species number ~ management + site + management : site + (1 mainplot) |           |                |
|-----------------------------------------------|-------------------|----------------------------------------------------------------------------------|-----------|----------------|
| <b>Error family &amp; link function:</b>      |                   | Gaussian, identity                                                               |           |                |
| <b>Deletion step</b>                          | <b>Parameter</b>  | <b><math>\chi^2</math></b>                                                       | <b>df</b> | <b>p-value</b> |
| 1                                             | management : site | 0.168                                                                            | 1         | 0.682          |
| 2                                             | management        | 0.019                                                                            | 1         | 0.892          |
|                                               | site              | 0.166                                                                            | 1         | 0.683          |
| 3                                             | site              | 0.166                                                                            | 1         | 0.684          |
| <b>Fixed effect in minimal adequate model</b> |                   | <b>Estimate</b>                                                                  | <b>SE</b> | <b>t-value</b> |
| Intercept                                     |                   | 1.23                                                                             | 0.16      | 7.743          |

D) Outcrossing per plant, insect pollinator sampling scale. NB. Mainplots are indicated with letters and blocks with numbers in figure 1, main text. Management treatments were conducted at this mainplot level.

Outcrossing (cbind(dark,light)) ~ management + site + temp + management : site  
+ management : temp + site : temp + management : site : temp + (1|cabinet) +  
(1|mainplot/block) + (1|observation level random effect)

**Maximal model:**

**Error family & link**

**function:** Binomial, logistic

| Deletion step                                                | Parameter                | $\chi^2$ | df    | p-value |
|--------------------------------------------------------------|--------------------------|----------|-------|---------|
| 1                                                            | management : site : temp | 0.002    | 1     | 0.966   |
| 2                                                            | management : site        | 0.006    | 1     | 0.936   |
|                                                              | site : temp              | 9.863    | 1     | 0.002   |
|                                                              | management : temp        | 0.111    | 1     | 0.739   |
| 3                                                            | management : temp        | 1.113    | 1     | 0.737   |
|                                                              | site : temp              | 9.859    | 1     | 0.002   |
| 4                                                            | management               | 0.563    | 1     | 0.453   |
|                                                              | site : temp              | 9.889    | 1     | 0.002   |
| Fixed effect in minimal adequate model                       |                          | Estimate | SE    | z-value |
| Control temperature plants that were bagged at Harborne site |                          | -0.813   | 0.340 | -2.389  |
| Heat stress                                                  |                          | 2.195    | 0.489 | 4.574   |
| Sonning site                                                 |                          | 0.102    | 0.489 | 0.207   |
| Heat stress : Sonning site                                   |                          | -2.238   | 0.689 | -3.249  |
